# Supplementary material
Source: HighWire-hosted journal article supplement (https://www.ghspjournal.org/highwire/filestream/5373/field_highwire_adjunct_files/1/GHSP-21-00292-Supplement.docx)
Supplement: GHSP-21-00292-Supplement.docx [file GHSP-21-00292-Supplement.docx]

**Supplement. Ranking of Full Results of Round 2 Survey on Questions Related to Respectful Newborn Care**

| **Descriptive Questions (N=52)** | **Frequency in Top 3, No. (%)** | **Weighted Mean Scorea** | **Level of Importance (Top 3 in Category)** |
| --- | --- | --- | --- |
| What are the manifestations of disrespectful care or mistreatment of newborns that are observed in the context of facility based maternity care? | 25 (48.1) | 2.96 | High (1) |
| How is respectful care of newborns defined by parents, by providers, and by the population in general? | 19 (36.5) | 3.10 | High (2) |
| What are the perceptions and beliefs of health workers that affect the quality of care they provide to newborns? | 15 (28.9) | 3.40 | High (3) |
| What is the prevalence of disrespect of newborns in health care facilities? | 14 (26.9) | 3.42 | High |
| What are the main causes of unnecessary separation between the mother and newborn in health facilities? | 13 (25.0) | 3.44 | Intermediate |
| What challenges do health facilities (including management, workers and infrastructure) experience, that limit or inhibit respectful care of newborns? | 12 (23.1) | 3.50 | Intermediate |
| What types of disrespect of newborns are of most concern to mothers and families? | 8 (15.4) | 3.71 | Intermediate |
| What beliefs and norms affect the way small and sick newborns are treated? | 7 (13.5) | 3.71 | Intermediate |
| What are the social norms among communities and family members that influence how newborns are treated? | 9 (17.3) | 3.75 | Intermediate |
| What challenges do health facilities (including management, workers and infrastructure) experience, that limit or inhibit respectful care of small and sick newborns? | 6 (11.5) | 3.77 | Intermediate |
| What beliefs and norms affect the way stillbirths and stillborn infants are treated? | 7 (13.5) | 3.77 | Intermediate |
| How do health facility workers explain or justify their actions, and do they perceive any of their actions as disrespectful of newborns? | 7 (13.5) | 3.85 | Intermediate |
| What do health facility workers believe is necessary to improve respectful care of newborns in their facility? | 6 (11.5) | 3.85 | Intermediate |
| Which aspects of treatment of newborns are influenced by motivation issues among the health facility workers (stemming from overwork, crowding, lack of pay, professional respect, etc.)? | 3 (5.8) | 3.88 | Low |
| Are some sub-groups of newborns more likely to experience disrespectful care than others and, if so, which groups are most vulnerable? | 3 (5.8) | 3.92 | Low |
| Besides social norms and health system constraints, what other drivers contribute to poor treatment of newborns or stillborn infants? | 2 (3.9) | 3.96 | Low |
| **Implementation Questions (N=50)** |  |  |  |
| How can respectful care of newborns be promoted as the standard of care in a given health facility? | 20 (40.0) | 3.08 | High (1) |
| How can health facility and management challenges be overcome to improve respectful care for newborns? | 17 (34.0) | 3.28 | High (2) |
| What are the successful strategies for advocating for respectful care of newborns? | 13 (26.0) | 3.48 | High (3) |
| What are the behaviors of health care workers that are the most difficult to change, and how can they be addressed? | 12 (24.0) | 3.48 | Intermediate |
| How can effective models of care that allow for minimal separation between mother and newborn during their stay in the health facility be implemented in health facilities? | 11 (22.0) | 3.50 | Intermediate |
| How can integrated care for both the mother and newborn best be provided in low resource settings, especially for high-risk cases? | 12 (24.0) | 3.52 | Intermediate |
| How can effective models of care for the small and sick newborn that combine concepts of respect, compassion, developmentally supportive care, and family centered care be best implemented, especially in low-income settings? | 11 (22.0) | 3.56 | Intermediate |
| How can respectful care of newborns care be promoted as the standard of care at a district or national level? | 12 (24.0) | 3.58 | Intermediate |
| What motivates governments to invest resources in respectful care for newborns? | 8 (16.0) | 3.64 | Intermediate |
| How can effective interventions to address social norms be implemented to improve care for stillborn infants and their families? | 10 (20.0) | 3.66 | Intermediate |
| How can effective models of care for that combine concepts of respect, compassion, developmentally supportive care, and family centered care be best adapted to humanitarian settings? | 8 (16.0) | 3.74 | Intermediate |
| How can power imbalances between health care providers and patients be addressed to improve care for newborns? | 7 (14.0) | 3.76 | Low |
| How can health facility and management challenges be overcome to improve care for newborns and their families? | 5 (10.0) | 3.86 | Low |
| What logistical and administrative barriers need to be addressed to improve respectful care of stillborn infants? | 6 (8.0) | 3.92 | Low |
| **Measurement Questions (N=47)** |  |  |  |
| What are the measurable and appropriate quantitative metrics for respectful care of newborns? | 35 (74.5) | 2.11 | High (1) |
| What is the impact of positive maternal prenatal and intra-partum experiences on birth outcomes? | 17 (36.2) | 3.28 | High (2) |
| How can respectful care for newborns be measured qualitatively? | 17 (36.2) | 3.45 | High (3) |
| What is the impact of respectful care of newborns on the health of newborns? | 14 (29.8) | 3.34 | Intermediate |
| How can unnecessary separation of the newborn from the mother be measured in quantitative surveys? | 9 (19.2) | 3.45 | Intermediate |
| How does disrespectful care of small and sick newborns affect their survival and ability to thrive? | 13 (27.7) | 3.49 | Intermediate |
| What are the long-term impacts of respectful or disrespectful care of newborns on infant neurodevelopment and early childhood development? | 12 (25.5) | 3.55 | Intermediate |
| What is the impact of respectful care of newborns on future health care utilization for the newborn/child? | 7 (14.9) | 3.70 | Intermediate |
| Which interventions to improve care for stillborn infants and their families have the greatest impact on patient satisfaction with care? | 6 (12.8) | 3.79 | Low |
| What effect does respectful care during stillbirth and of the stillborn infant have on maternal health? | 7 (14.9) | 3.81 | Intermediate |
| How do we measure denial or threat of denial of care to newborns? | 1 (2.1) | 3.98 | Low |

a The lowest mean represents the highest importance.
